# Supplementary material for: A strategy to control the grain boundary density and Cu+/Cu0 ratio of Cu-based catalysts for efficient electroreduction of CO2 to C2 products
Source: Royal Society of Chemistry journal article supplement (doi:10.1039/d0gc00247j), 2020-01-01
Supplement: d0gc00247j1.pdf [file d0gc00247j1.pdf]

## Electronic Supplementary Information

### **A strategy to control grain boundary density and Cu<sup>+</sup>/Cu<sup>0</sup> ratio of Cu-based catalysts for efficient electroreduction of CO<sub>2</sub> to C2 products**

Chunjun Chen,<sup>a,b</sup> Xiaofu Sun,<sup>a,b\*</sup> Xupeng Yan,<sup>a,b</sup> Yahui Wu,<sup>a,b</sup> Mingyang Liu,<sup>a,b</sup> Shuaishuai Liu,<sup>a,b</sup> Zhijuan Zhao,<sup>a</sup> Buxing Han<sup>a,b,c,d\*</sup>

<sup>a</sup>Beijing National Laboratory for Molecular Sciences, Key Laboratory of Colloid and Interface and Thermodynamics, Institute of Chemistry, Chinese Academy of Sciences, Beijing 100190, China

<sup>b</sup>School of Chemistry and Chemical Engineering, University of Chinese Academy of Sciences, Beijing 100049, China

<sup>c</sup>Physical Science Laboratory, Huairou National Comprehensive Science Center, No. 5 Yanqi East Second Street, Beijing 101400, China

<sup>d</sup>Shanghai Key Laboratory of Green Chemistry and Chemical Processes, School of Chemistry and Molecular Engineering, East China Normal University, Shanghai 200062, China

## Experimental Section

**Materials:** Ethanol, orthophosphoric acid (85%), sodium hydroxide (NaOH), potassium persulfate ( $K_2S_2O_8$ ) and acetone were obtained from Sinopharm Chem. Reagent Co. Ltd. Cu film,  $H_2^{18}O$ , Potassium bicarbonate ( $KHCO_3$ ) and Nafion N-117 membrane (0.180 mm thick,  $\geq 0.90$  meg/g exchange capacity) were purchased from Alfa Aesar China Co., Ltd.  $N_2$  and  $CO_2$  (99.999%) were provided by Beijing Analytical Instrument Company.

**Synthetic procedures for  $Cu(OH)_2$ :**  $Cu(OH)_2$  were prepared through modified chemical immersion method.<sup>S1</sup> In a typical procedure, a Cu foil (10 mm×10 mm) was mechanically polished, then electropolished in 85 wt% phosphoric acid at 2.0 V vs. Ag/AgCl for 500 s. Polished Cu foils were washed with deionized water, and immersed into a chemical bath immediately. The bath was filled with sodium hydroxide (4.0 g), potassium persulfate (1.62 g) and deionized water (40 mL). After 10 h,  $Cu(OH)_2$  film was obtained, and then it was washed with deionized water.

**Synthetic procedures for R-Cu-x:** Firstly, the muffle furnace was preheated to 500 °C with a heating rate of 10 °C min<sup>-1</sup> and maintained at 500 °C. Then the obtained  $Cu(OH)_2$  was quickly put in the muffle furnace with 500 °C by crucible tongs, and taken out quickly after calcining for several minutes. The  $Cu(OH)_2/CuO$  composites were prepared. For clarity, Composites-x refers to  $Cu(OH)_2/CuO$  film, and x represents the the minutes of calcination. Finally, Composites-x were electrochemically reduced at -2.0 V vs. RHE for 500 s, leading to the formation of R-Cu-x.

**Materials characterizations:** The microstructures of the catalysts were characterized by scanning electron microscope (SEM, HITACHI S-4800) and transmission electron microscopy (TEM, JEOL JEM-2100F) equipped with EDS. X-ray photoelectron spectroscopy (XPS) study was carried out on the Thermo Scientific ESCALab 250Xi using a 200W Al-K $\alpha$  radiation. In the analysis chamber, the base pressure was about  $3 \times 10^{-10}$  mbar. Typically, the hydrocarbon C1s line at 284.8 eV from adventitious carbon was used for energy referencing. X-Ray diffraction (XRD) analysis of the samples were performed on a Rigaku D/max-2500 X-ray diffractometer with Cu-K $\alpha$  radiation ( $\lambda = 0.15406$  nm) and the scan speed was 5°/min. The Raman spectra of the samples were obtained at room temperature in flamesealed capillary on a FT Bruker RFS 106/S spectrometer, equipped with a 514 nm laser, in the region from 1000 to 100 cm<sup>-1</sup> with a resolution of 2 cm<sup>-1</sup>.

**Semi-in-situ X-ray photoelectron spectroscopy.** In order to detect accurately the valence state of Cu, the XPS samples were processed in a glove box. After electrolysis, the electrode plate was soaked in acetone solution, and put into the glove box immediately. The obtained electrode plate was cut into 3 × 3 mm and glued on a support. The support could be evacuated into vacuum to prevent the samples to be oxidized by the air. The subsequent testing

processes were the same as the common XPS.

**Electrochemical study:** All the experiments of CO<sub>2</sub> reduction were carried out on the electrochemical workstation (CHI 660E, Shanghai CH Instruments Co., China). Linear sweep voltammetry (LSV) scans were conducted in a single compartment cell with a three electrodes configuration, which consisted of working electrode, a platinum gauze as counter electrode, and Ag/AgCl (saturated KCl solution) as reference electrode. Prior to experiment, the electrolyte was bubbled with N<sub>2</sub> or CO<sub>2</sub> at least 30 min to form N<sub>2</sub> or CO<sub>2</sub> saturated solution. LSV measurement in gas-saturated electrolytes was conducted in the potential range of 0 V to -1.2 V versus RHE at a desired 20 mV s<sup>-1</sup> sweep rate. All potentials cited in this work were referenced to the RHE. The potentials were converted to RHE using the formulas  $E(\text{vs RHE}) = E(\text{vs Ag/AgCl}) + 0.197 \text{ V} + 0.0591 \times \text{pH}$ .

The electrolysis experiments were conducted at 25 °C in a H-type cell<sup>S2</sup> with a working cathode, a counter anode (platinum gauze), and a reference electrode (Ag/AgCl with saturated KCl). In the experiment, Nafion-117 membrane was used as proton exchange membrane to separate the cathode and anode compartments. KHCO<sub>3</sub> aqueous solution (0.1 M) were used as electrolyte. In each experiment, the amount of electrolyte was 30 mL. Before the electrolysis experiment, the catholyte was bubbled with CO<sub>2</sub> for 30 min under stirring and the electrolysis was carried out under a steady stream of CO<sub>2</sub> (20 sccm).

**Product analysis.** The gaseous product of electrochemical experiments was collected using a gas bag and analyzed by gas chromatography (GC, HP 4890D), which was equipped with TCD detectors using argon as the carrier gas. The liquid product was analyzed by <sup>1</sup>H NMR (Bruker Avance III 400 HD spectrometer) in deuteroxide with phenol as an internal standard.

### **Calculations of Faradaic efficiencies of gasous and liquid products.**

#### **liquid products:**

After electrolysis, a certain amount of phenol solution was added to the electrolyte as the internal standard. Because the concentration of phenol was known, the moles of liquids products can be calculated from integral areas and calibration curves.

The Faradaic efficiency of liquid product is:

$$FE = \frac{\text{moles of product}}{Q / nF} \times 100\%$$

(Q: electric quantity; F: Avogadro constant; n: transfer electron number)

#### **Gasous products:**

From the GC peak areas and calibration curves for the TCD detector, we can obtain the V % of gasous products .

Since the flow rate of the CO<sub>2</sub> was constant, the moles of gaseous products can be calculated. The Faradaic efficiency of gaseous product is:

$$FE = \frac{\text{moles of product}}{Q / nF} \times 100\%$$

(Q: electric quantity; F: Avogadro constant; n: transfer electron number)

**Electrochemical impedance spectroscopy (EIS) study:** The EIS measurement was carried out in KHCO<sub>3</sub> aqueous solution (0.1 M) at an open circuit potential (OCP) with an amplitude of 5 mV of 10<sup>-2</sup> to 10<sup>5</sup> Hz.

**Double-layer capacitance (C<sub>dl</sub>) measurements:** The electrochemical active surface area is proportional to C<sub>dl</sub> value. C<sub>dl</sub> was determined by measuring the capacitive current associated with double-layer charging from the scan-rate dependence of cyclic voltammogram (CV). The CV ranged from -0.6 V to -0.7 V vs. Ag/AgCl. The C<sub>dl</sub> was estimated by plotting Δ*j* (*j<sub>a</sub>*-*j<sub>c</sub>*) at -0.65 V vs Ag/AgCl against the scan rates, in which *j<sub>a</sub>* and *j<sub>c</sub>* were the anodic and cathodic current density, respectively. The scan rates were 20, 30, 40, 50 and 60 mV s<sup>-1</sup>.

The ECSA of the working electrodes could be calculated according to the following equation: ECSA = R<sub>f</sub>S, where S was the real surface area of the working electrode and R<sub>f</sub> was the roughness factor of the working electrode. Notably, S was generally equal to the geometric area of working electrode (in this work, S = 1 cm<sup>2</sup>). The roughness factor (R<sub>f</sub>) can be calculated by the relation R<sub>f</sub> = C<sub>dl</sub>/a. The roughness factor of R-Cu(OH)<sub>2</sub> was defined to be 1, then the normalized current density can be calculated according to roughness factor of different catalysts.

#### **Measurement of grain boundary (GB) surface densities<sup>S3</sup>:**

The method described below was chosen to provide an accurate measurement of the relative GB surface density. We chose ~30 nanoparticles from high resolution TEM images for each of R-Cu-x sample (as-deposited R-Cu(OH)<sub>2</sub>, R-Cu-2, R-Cu-5, R-Cu-10 and R-Cu-20). For each of these NP images, the length of the GBs (if present) and the particle area were measured.

L<sub>*i*</sub> = GB length in TEM image for particle *i*

A<sub>*i*</sub> = particle area in TEM image for particle *i*

L<sub>*i*</sub> was determined by measuring the length of a line traced over the GB image. Most particles had GBs, so the GBs were readily identified. To measure A<sub>*i*</sub>, each particle image was approximated either as a circle, a rod with semi-circular caps, or a combination of these shapes (see below). The image was fit to two shapes, one slightly smaller than the image and one slightly larger. A<sub>*i*</sub> was taken to be the average of the areas of these two fits. This method of measuring the particle area in the TEM image was chosen because the values could readily be converted into 3D particle surface areas. The measured values L<sub>*i*</sub> and A<sub>*i*</sub> were converted to the 3D GB surface lengths and the 3D

particle surface areas using conversion factors derived from the assumption that the particles have round morphologies:

$C_L$  = conversion factor from measured GB length  $L_i$  to 3D GB surface length;

$C_A$  = conversion factor from measured particle area  $A_i$  to 3D particle surface area.

The 3D GB surface length was approximated as the circumference of a circle with diameter  $L_i$ :

3D GB surface length  $= \pi L_i$ , so conversion factor  $C_L = \pi$

The value for  $C_A$  depends on the particle shape as illustrated in the following examples:

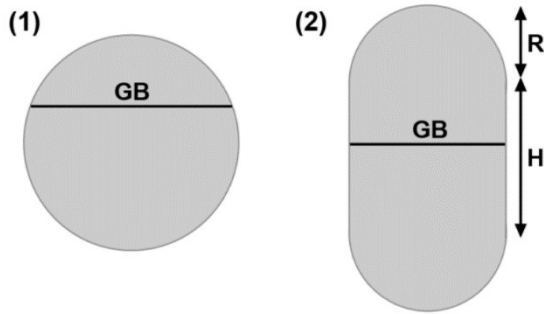

(1) Spherical shape, with radius  $R$  and measured GB length  $L$

3D GB surface length  $= \pi L$

3D particle surface area  $= 4\pi R^2$ , so conversion factor  $C_A = 4$  for this model.

(2) Cylindrical shape with length  $H$ , hemispherical ends of radius  $R$ , and GB length  $L$

3D GB surface length  $= \pi L$

3D particle surface area  $= 4\pi R^2 + 2\pi RH$ , so  $C_A = \frac{4\pi R^2 + 2\pi RH}{\pi R^2 + 2RH} = 4 - \frac{4 - \pi}{1 + \frac{\pi R}{2H}}$  for this model.

(3) Other complicated geometries (a small fraction) could be divided into parts that fit simple models such as sphere, hemisphere, and cylinder.

Using all of the measured values for  $L_i$  and  $A_i$  for all of the NPs imaged, and the appropriate conversion factors, the

3D GB surface densities were calculated as follows:

$$\text{3D GB surface density} = \frac{\sum_{\text{All particles}} \text{GB Surface Length}}{\sum_{\text{All particles}} \text{Surface Area}} = \frac{\sum_i \pi L_i}{\sum_i C_A A_i}$$

## Supplementary Figures

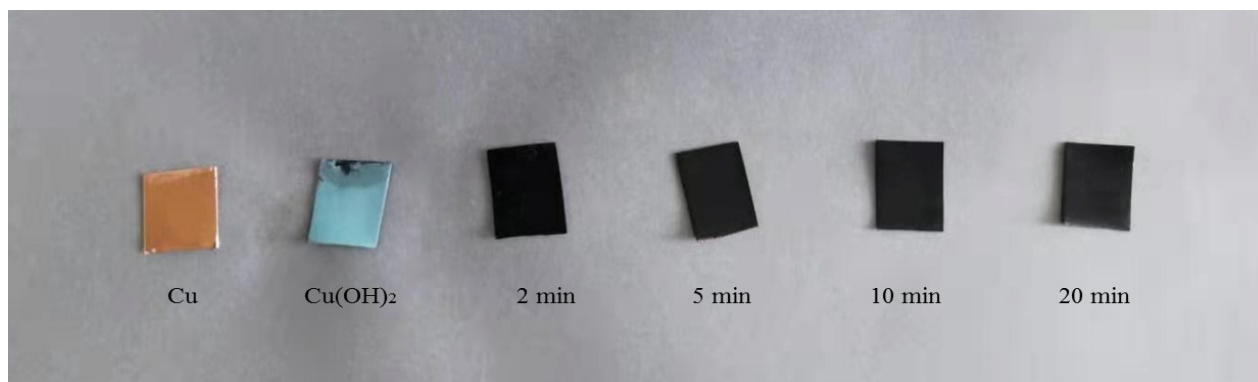

**Figure S1.** The optical pictures of the samples.

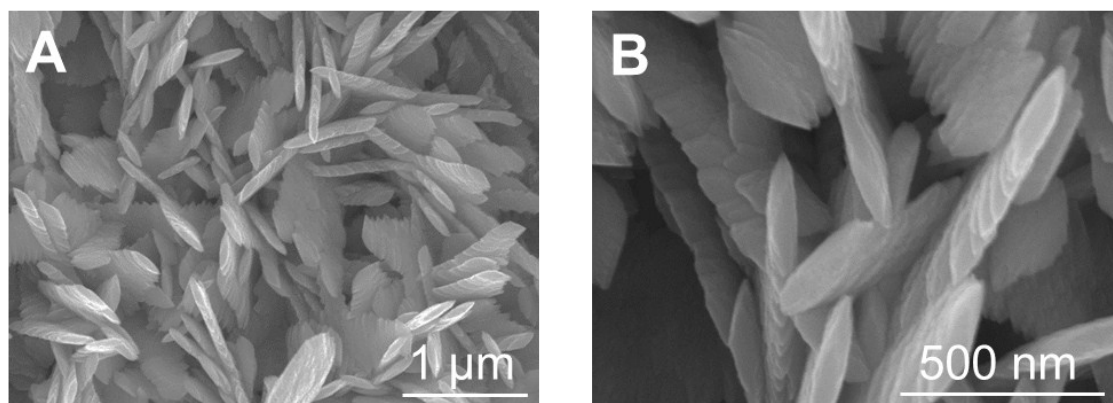

**Figure S2.** SEM images of Cu(OH)<sub>2</sub>.

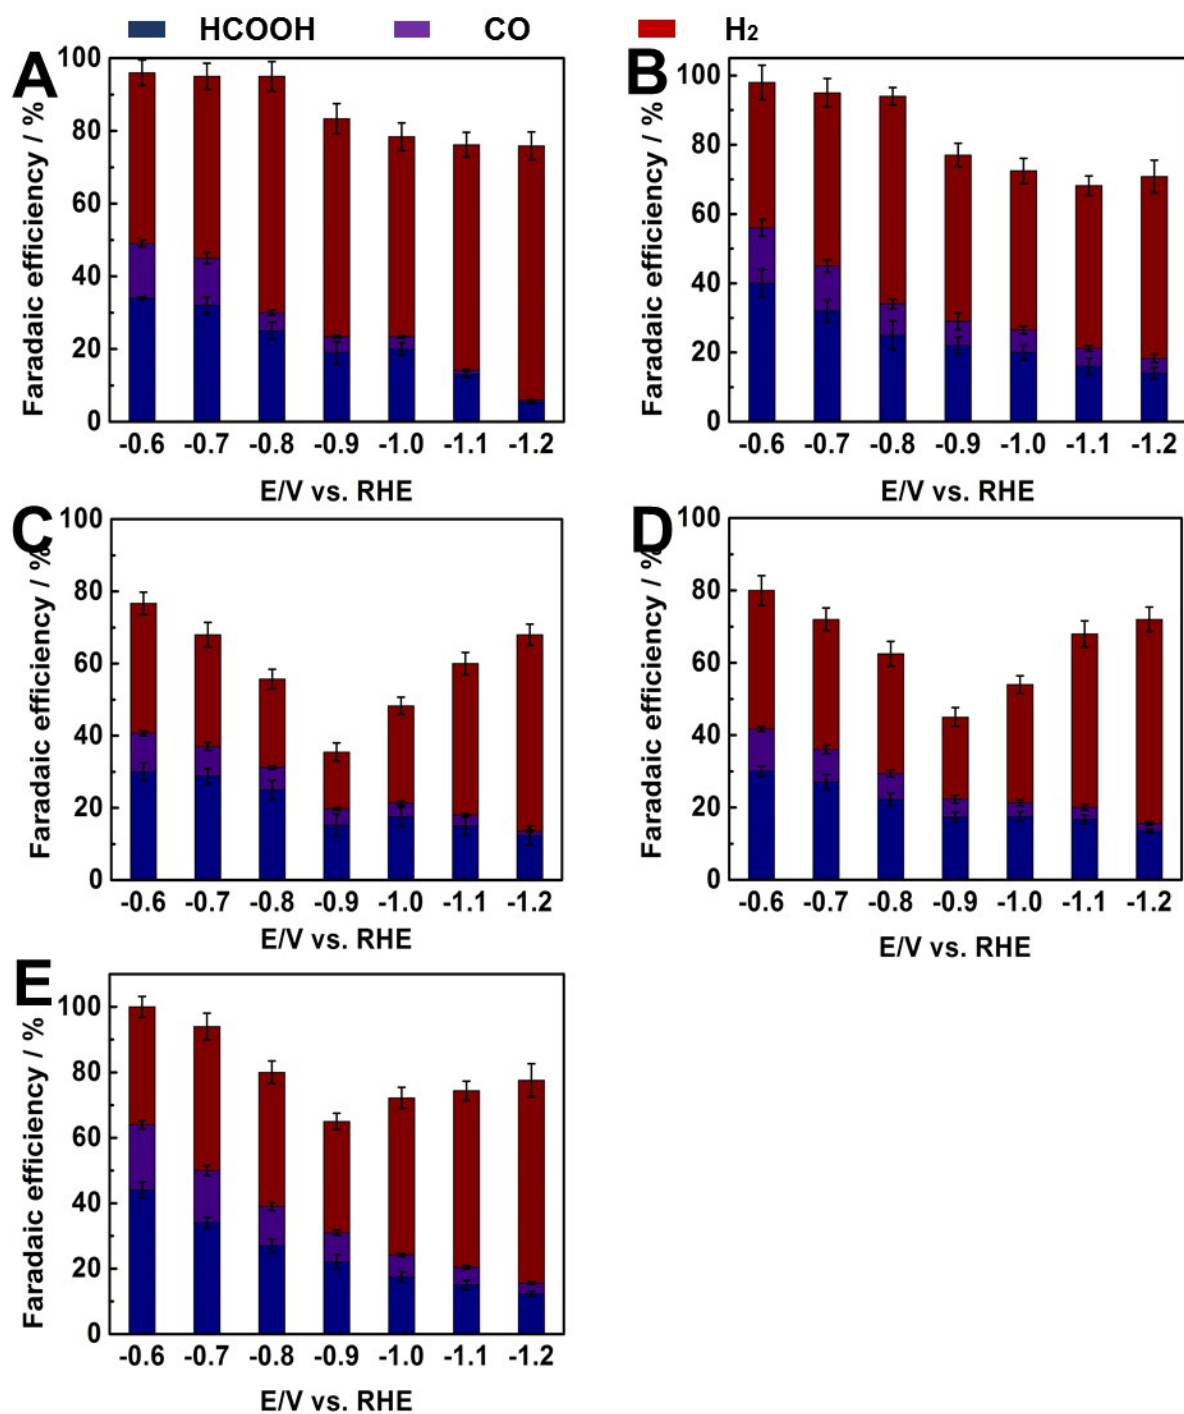

**Figure S3.** The distribution of H<sub>2</sub> and C1 products for R-Cu-x: R-Cu(OH)<sub>2</sub> (A), R-Cu-2 (B), R-Cu-5 (C), R-Cu-10 (D) and R-Cu-20 (E).

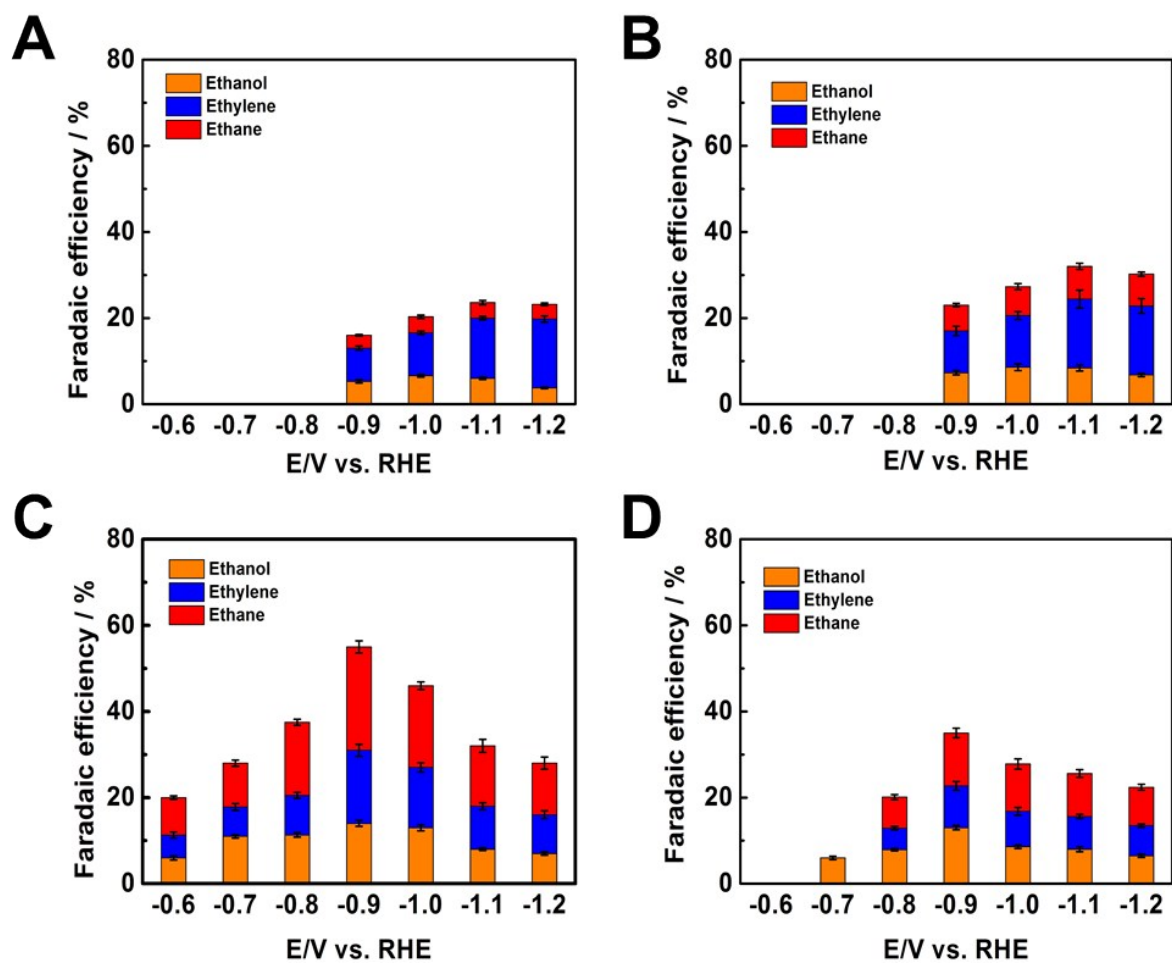

**Figure S4.** The distribution of C<sub>2</sub> products for R-Cu-x: R-Cu(OH)<sub>2</sub> (A), R-Cu-2 (B), R-Cu-10 (C) and R-Cu-20 (D).



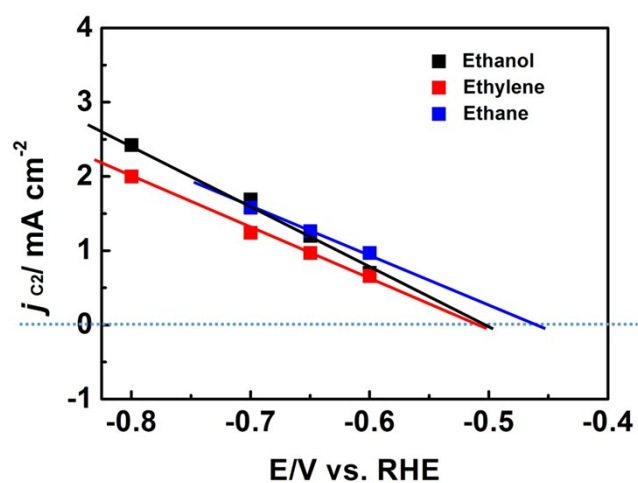

**Figure S5.** The onset potentials of C2 products for R-Cu-5, obtained from the tangent line method.

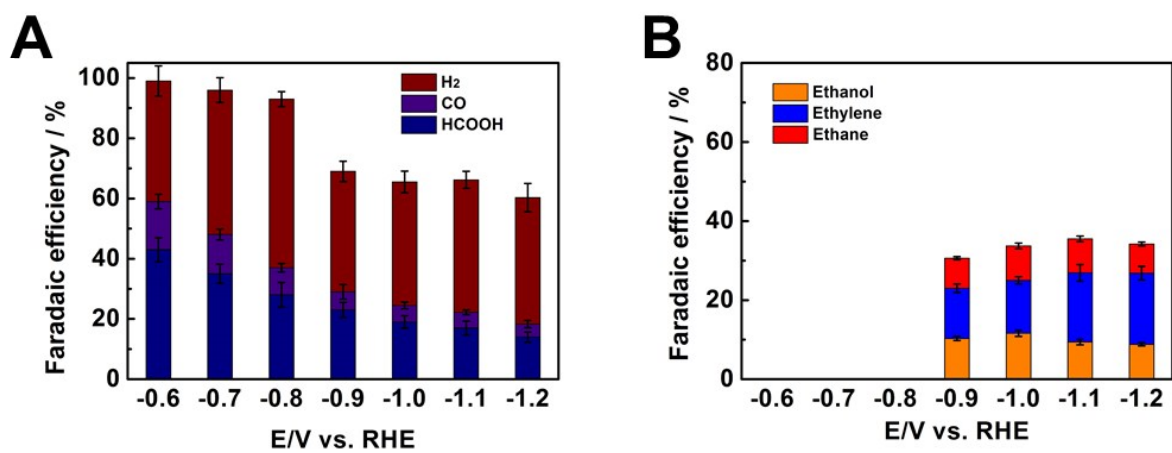

**Figure S6.** (A) The distribution of H<sub>2</sub> and C1 products for R-Cu-5 (400); (B) The distribution of C2 products for R-Cu-5 (400). R-Cu-5 (400) represents the material calcined at 400 °C for 5 min.

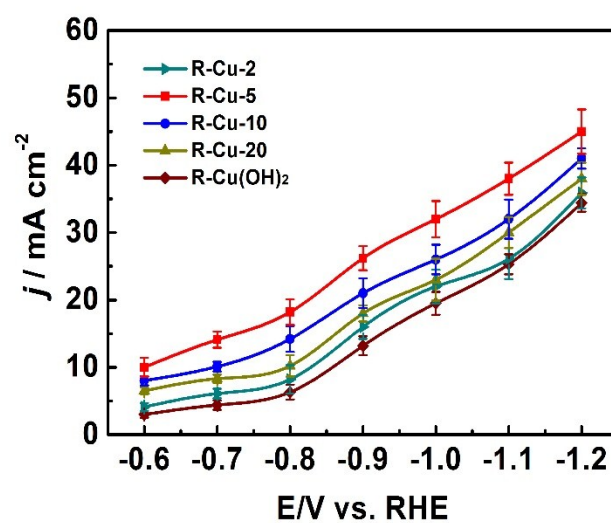

**Figure S7.** The total current density over different R-Cu-x.

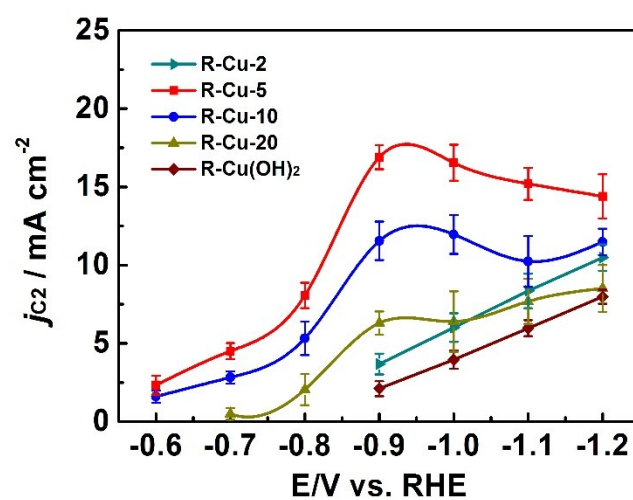

**Figure S8.** The current density for C2 products over different R-Cu-x.

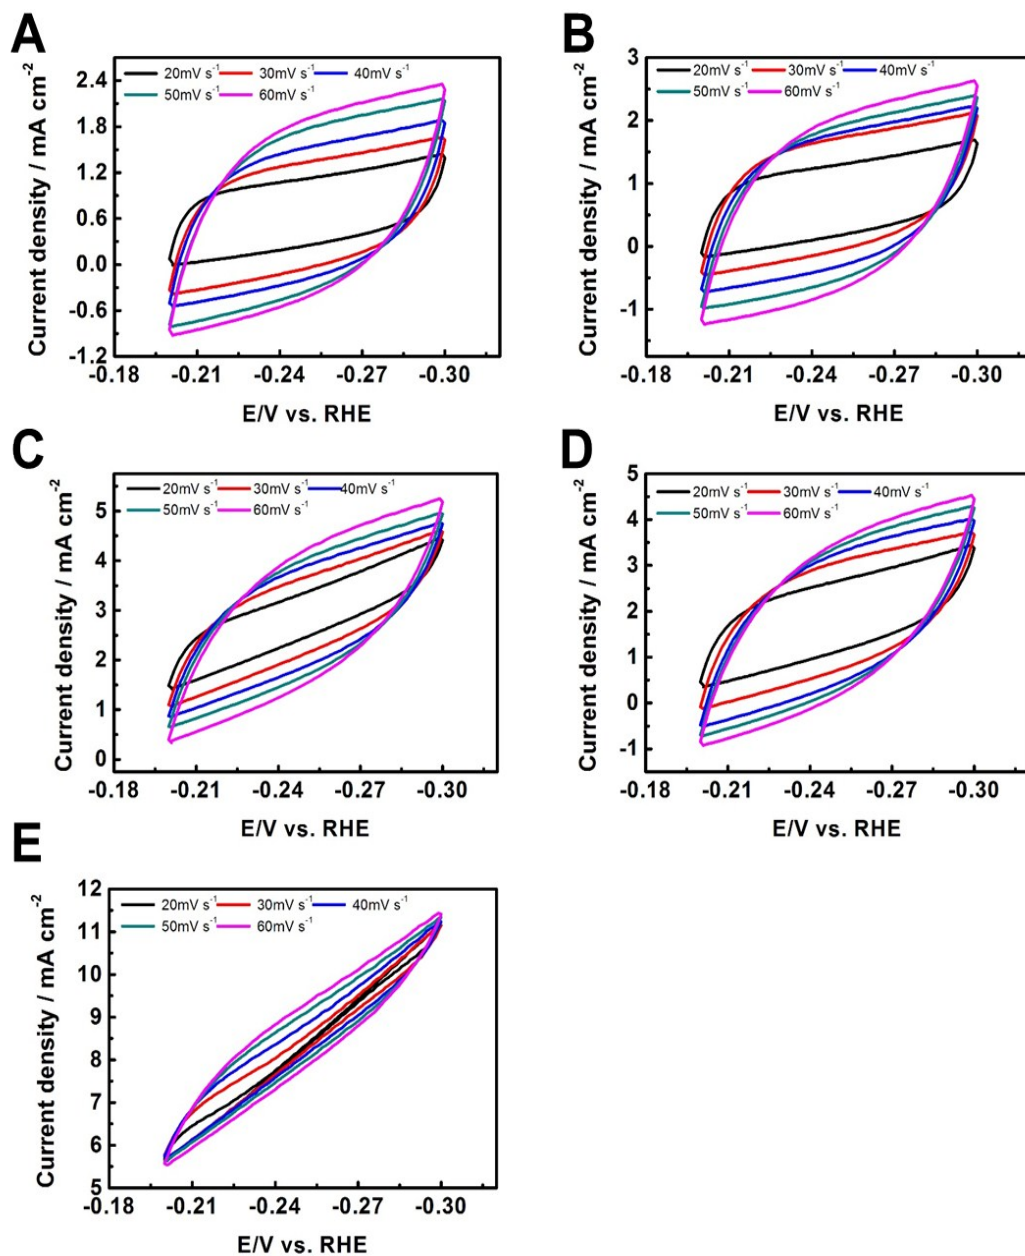

**Figure S9.** The cyclic voltammetry results on R-Cu-x at different scan rates: R-Cu(OH)<sub>2</sub> (A), R-Cu-2 (B), R-Cu-5 (C), R-Cu-10 (D) and R-Cu-20 (E).

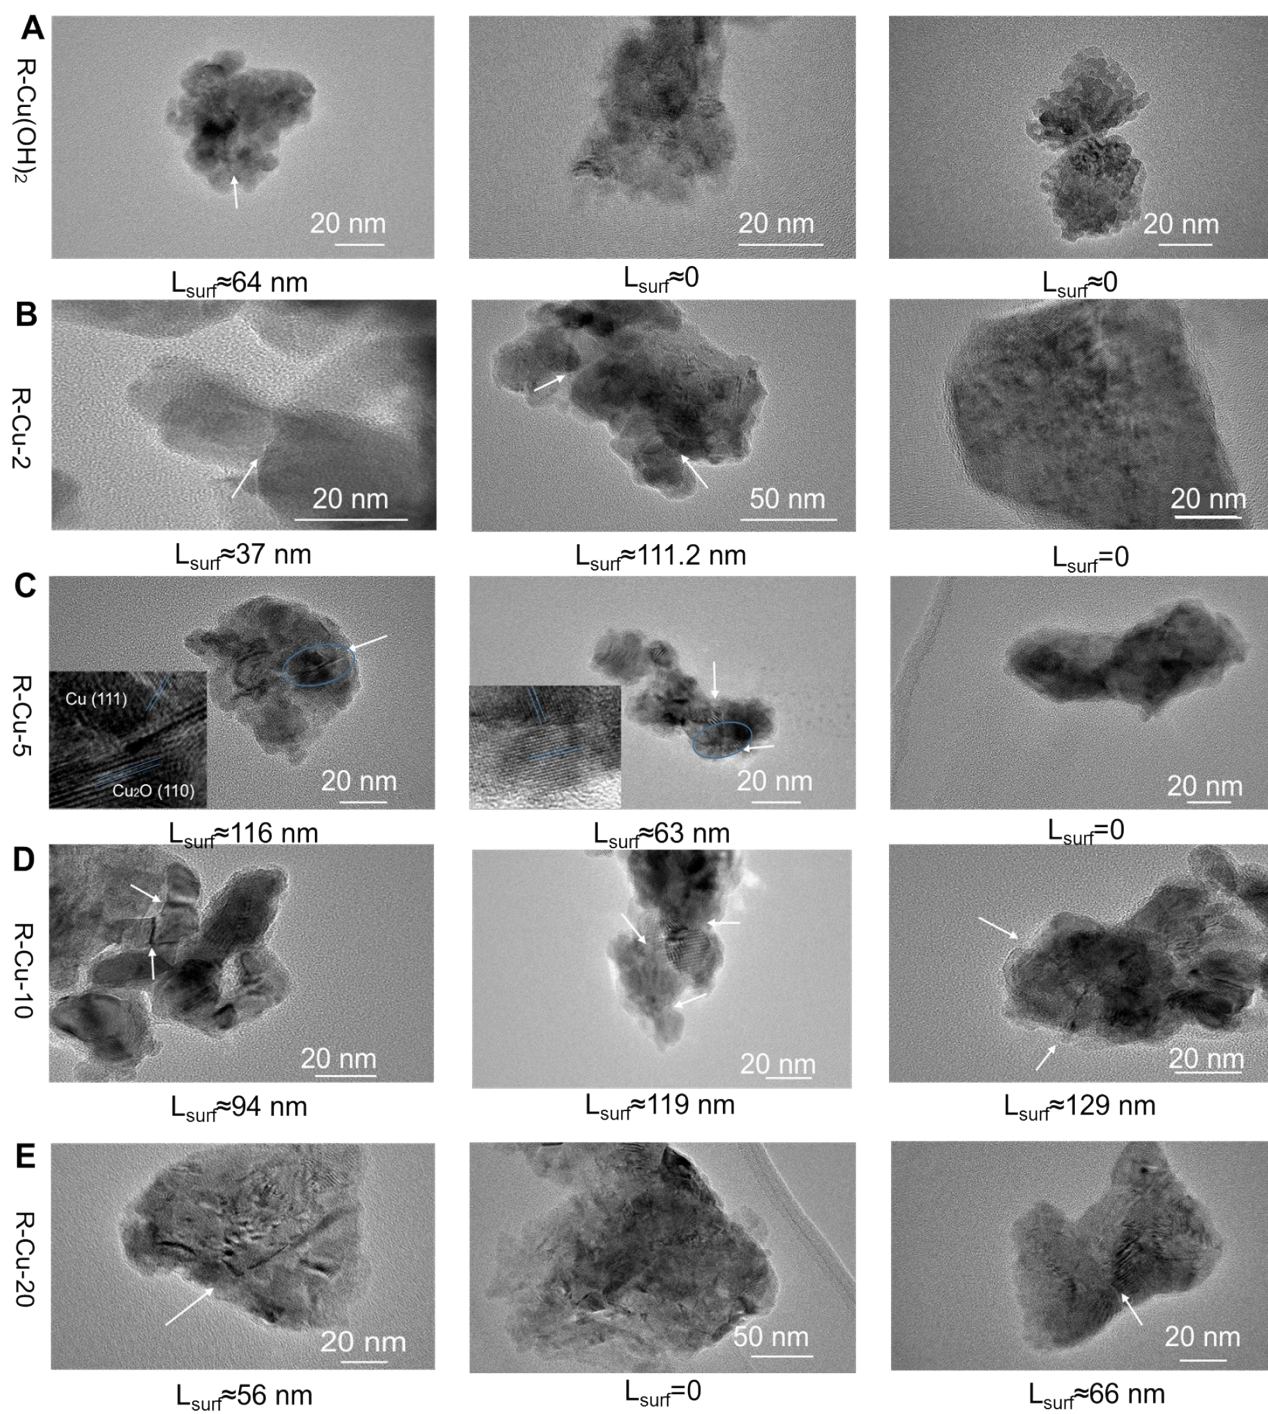

**Figure S10.** HR-TEM images of different R-Cu-x.

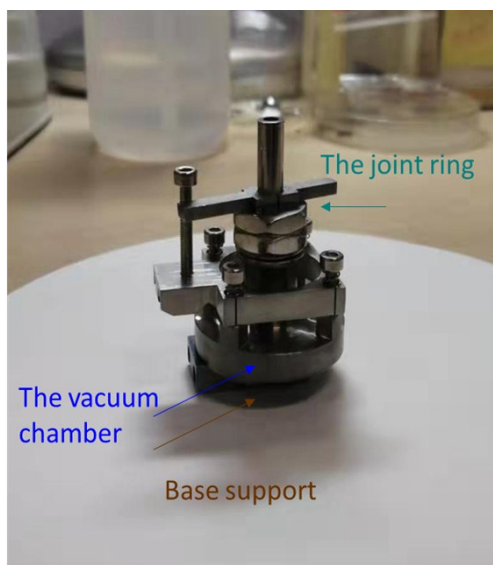

**Figure S11.** The optical pictures of the semi-in-situ XPS cell. The obtained electrode plate was cut into  $3 \times 3$  mm and glued on the support. The vacuum chamber could be evacuated into vacuum to prevent the samples to be oxidized by the air.



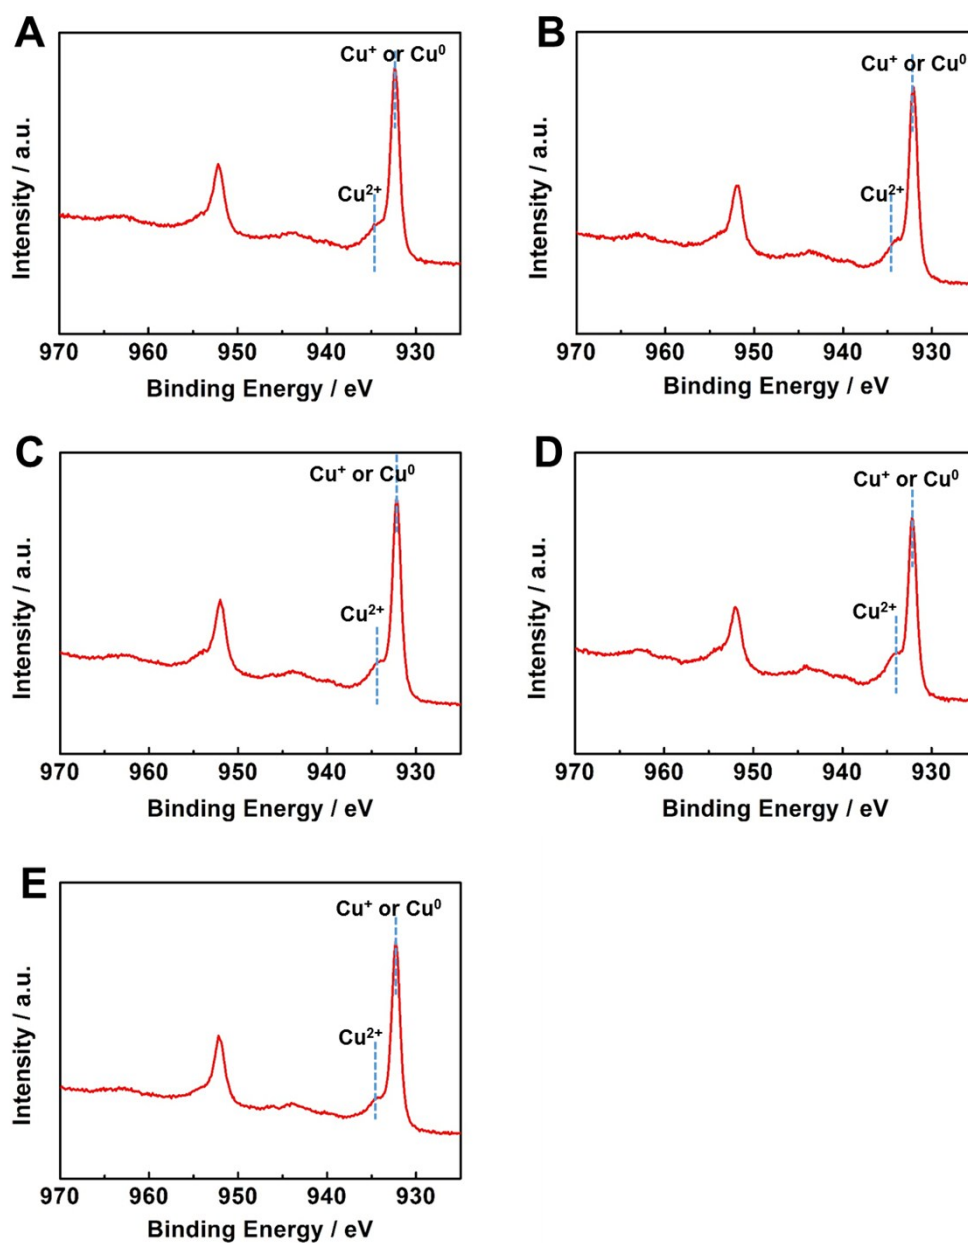

**Figure S12.** XPS spectra of Cu 2p orbits: R-Cu(OH)<sub>2</sub> (A), R-Cu-2 (B), R-Cu-5 (C), R-Cu-10 (D) and R-Cu-20 (E).

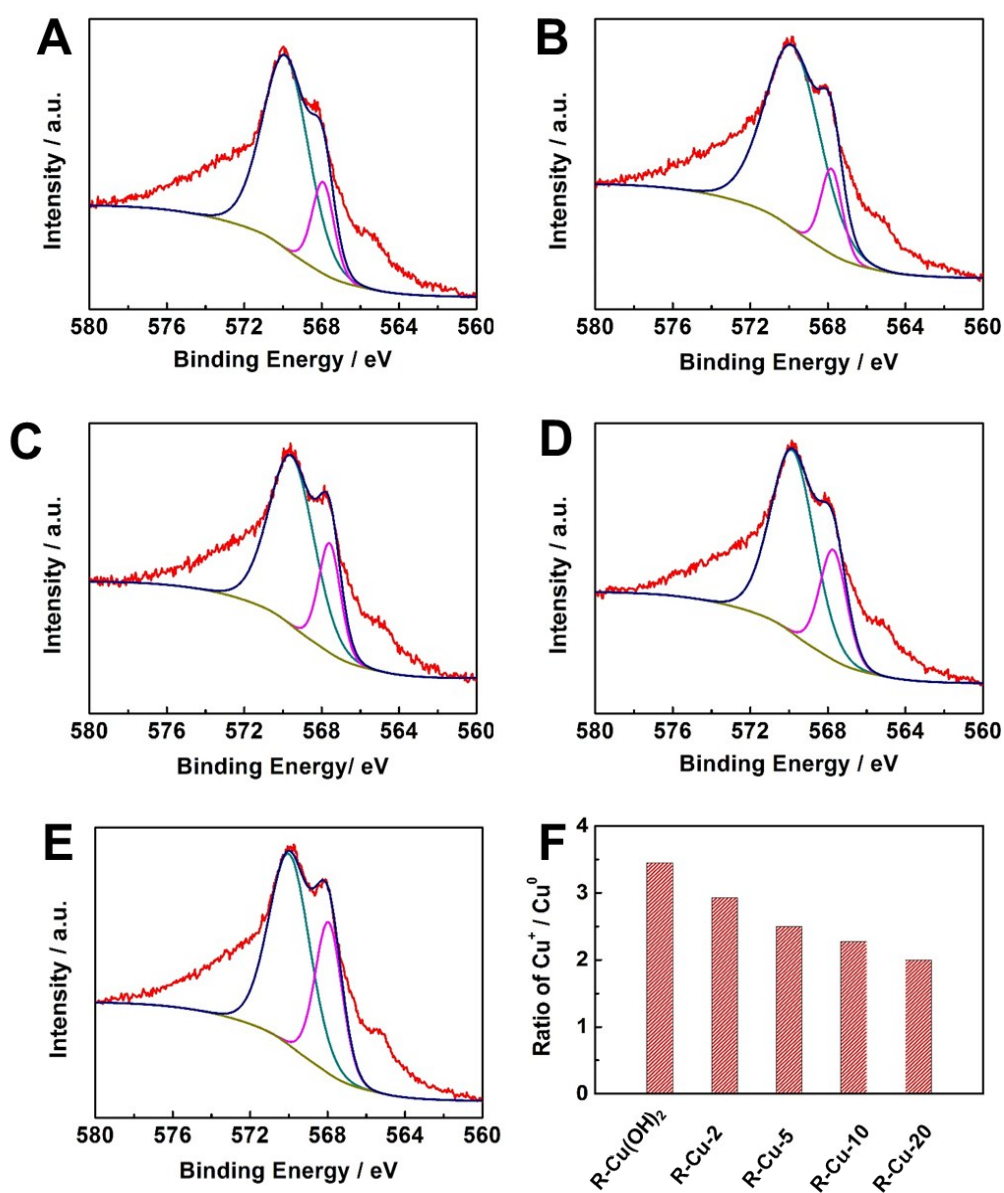

**Figure S13.** The fitting Auger Cu LMM line spectra: R-Cu(OH)<sub>2</sub> (A), R-Cu-2 (B), R-Cu-5 (C), R-Cu-10 (D), R-Cu-20 (E) and the ratios of Cu<sup>+</sup>/Cu<sup>0</sup> over different R-Cu-x (F).

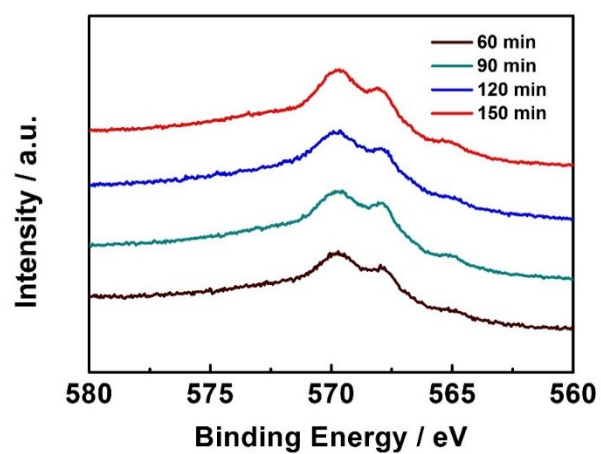

**Figure S14.** LMM Auger spectra of Cu for R-Cu-5 with different electrolysis time.



## Supplementary Tables

**Table S1. The onset potential of C2 products over R-Cu-x catalysts.**

| Catalysts             | Ethane(V vs. RHE) | ethanol(V vs. RHE) | ethylene(V vs. RHE) |
|-----------------------|-------------------|--------------------|---------------------|
| R-Cu(OH) <sub>2</sub> | -0.79             | -0.78              | -0.82               |
| R-Cu-2                | -0.73             | -0.74              | -0.76               |
| R-Cu-5                | -0.45             | -0.50              | -0.51               |
| R-Cu-10               | -0.45             | -0.51              | -0.53               |
| R-Cu-20               | -0.72             | -0.73              | -0.74               |

**Table S2. Comparison of Optimized C2+ products on various Cu-based catalysts.**

| Samples                          | Substrate           | electrolyte             | E vs. RHE | FEC2+ (%) | reference<br>s |
|----------------------------------|---------------------|-------------------------|-----------|-----------|----------------|
| R-Cu-5                           | Cu plate            | 0.1M KHCO <sub>3</sub>  | -0.9      | 64.5      | This work      |
| Cu <sub>2</sub> O NP/C           | Glassy carbon       | 0.1M KHCO <sub>3</sub>  | -1.1      | 74.0      | S4             |
| copper from a sol-gel            | Carbon paper        | 0.1M KHCO <sub>3</sub>  | -1.2      | 52.9      | S5             |
| Cu <sub>2</sub> O-derived Cu NPs | Cu plate            | 0.1M KHCO <sub>3</sub>  | -1.1      | 33.5      | S6             |
| Cu <sub>2</sub> O-derived Cu NPs | Cu disc             | 0.1M KHCO <sub>3</sub>  | -1.0      | 48.1      | S7             |
| Cu <sub>2</sub> O (Cl induced)   | Cu disc             | 0.1M KCl                | -1.8      | 55.1      | S8             |
| Cu <sub>2</sub> O film (1.7μm)   | Cu disc             | 0.1M KHCO <sub>3</sub>  | -0.99     | 47.9      | S9             |
| Mesoporous Cu <sub>2</sub> O     | Cu foam on Cu wafer | 0.5M NaHCO <sub>3</sub> | -0.8      | 55.0      | S10            |
| Mesocrystal Cu from CuCl film    | Cu disc             | 0.1M KHCO <sub>3</sub>  | -0.99     | 27.2      | S11            |
| Agglomerated nanocrystal         | Cu Cu disc          | 0.1M KHCO <sub>3</sub>  | -0.95     | 60.3      | S12            |
| Transformed ensemble             | Cu NP Carbon paper  | 0.1M KHCO <sub>3</sub>  | -0.85     | 55.2      | S13            |
| Cu nanocube (44nm)               | Glassy carbon       | 0.1M KHCO <sub>3</sub>  | -1.1      | 50.1      | S14            |
| Cu NPs (7nm)                     | Glassy carbon       | 0.1M NaHCO <sub>3</sub> | -1.15     | 5         | S15            |
| Plasma-Copper Nanocube           | Cu film             | 0.1M KHCO <sub>3</sub>  | -0.9      | 60        | S16            |

**Table S3. Comparison of C2+ products on various Cu-based catalysts at low potentials.**

| catalysts                             | Electrolyte             | j (C2) /<br>mA cm <sup>-2</sup> | FE (C2) /<br>% | Potential (V<br>vs. RHE) | Reference |
|---------------------------------------|-------------------------|---------------------------------|----------------|--------------------------|-----------|
| R-Cu-5                                | 0.1M KHCO <sub>3</sub>  | 2.3                             | 22.5           | -0.6                     | This work |
| R-Cu-5                                | 0.1M KHCO <sub>3</sub>  | 4.5                             | 32.1           | -0.7                     | This work |
| B-Oxide-derived copper                | 0.1M KHCO <sub>3</sub>  | 2.2                             | 27             | -0.7                     | S1        |
| Nanopores-Copper                      | 0.1M KHCO <sub>3</sub>  | 0                               | 0              | -0.7                     | S17       |
| Oxide-Derived Cu <sub>x</sub> Zn      | 0.1M KHCO <sub>3</sub>  | 0                               | 0              | -0.7                     | S18       |
| Plasma-Copper Nanocube                | 0.1M KHCO <sub>3</sub>  | 0.39                            | 13             | -0.7                     | S11       |
| Amino acid modified<br>copper         | 0.1M KHCO <sub>3</sub>  | 0.1                             | 3              | -0.7                     | S19       |
| Metal ion cycling of Cu<br>foil       | 0.25M KHCO <sub>3</sub> | 1                               | 8              | -0.7                     | S20       |
| copper from a sol-gel                 | 0.1M KHCO <sub>3</sub>  | 0.3                             | 3              | -0.7                     | S5        |
| Bi-Phasic Cu <sub>2</sub> O-Cu        | 0.1M KHCO <sub>3</sub>  | 0.1                             | 5              | -0.7                     | S21       |
| Highly Dense Cu<br>Nanowires          | 0.1M KHCO <sub>3</sub>  | 3                               | 25             | -0.7                     | S22       |
| Mixed Copper States in<br>Anodized Cu | 0.1M KHCO <sub>3</sub>  | -                               | 3              | -0.7                     | S23       |

**Table S4. The results of  $C_{dl}$  and roughness factor for different samples.**

| Catalysts             | The slope (mF cm <sup>-2</sup> ) | $C_{dl}$ (mF cm <sup>-2</sup> ) | roughness factor |
|-----------------------|----------------------------------|---------------------------------|------------------|
| R-Cu(OH) <sub>2</sub> | 34.4                             | 17.2                            | 1                |
| R-Cu-2                | 36.8                             | 18.4                            | 1.07             |
| R-Cu-5                | 47.0                             | 23.5                            | 1.37             |
| R-Cu-10               | 41.7                             | 20.9                            | 1.21             |
| R-Cu-20               | 37.5                             | 18.8                            | 1.09             |

**Table S5. The Grain boundaries surface density for different samples.**

| catalysts             | Grain boundaries surface density (μm <sup>-1</sup> ) |
|-----------------------|------------------------------------------------------|
| R-Cu(OH) <sub>2</sub> | 12.7                                                 |
| R-Cu-2                | 36.9                                                 |
| R-Cu-5                | 64.8                                                 |
| R-Cu-10               | 86.4                                                 |
| R-Cu-20               | 57.2                                                 |

## References

- S1 C. Chen, X. Sun, L. Lu, D. Yang, J. Ma, Q. Zhu, Q. Qian, B. Han, *Green Chem.* **2018**, *20*, 4579.
- S2 X. Kang, Q. Zhu, X. Sun, J. Hu, J. Zhang, Z. Liu, B. Han, *Chem. Sci.* **2016**, *7*, 266.
- S3 X. Feng, K. Jiang, S. Fan, M. W. Kanan, *J. Am. Chem. Soc.* **2015**, *137*, 4606.
- S4 H. Jung, S. Y. Lee, C. W. Lee, M. K. Cho, D. H. Won, C. Kim, H. S. Oh, B. K. Min, Y. J. Hwang, *J. Am. Chem. Soc.* **2019**, *141*, 4624.
- S5 P. De Luna, R. Quintero-Bermudez, C.-T. Dinh, M. B. Ross, O. S. Bushuyev, P. Todorović, T. Regier, S. O. Kelley, P. Yang, E. H. Sargent, *Nat. Catal.* **2018**, *1*, 103.
- S6 R. Kas, R. Kortlever, A. Milbrat, M. T. M. Koper, G. Mul, J. Baltrusaitis, *Phys. Chem. Chem. Phys.* **2014**, *16*, 12194.
- S7 C. S. Chen, J. H. Wan, B. S. Yeo, *J. Phys. Chem. C* **2015**, *119*, 26875.
- S8 D. Kim, S. Lee, J. D. Ocon, B. Jeong, J. K. Lee, J. Lee, *Phys. Chem. Chem. Phys.* **2015**, *17*, 824.
- S9 D. Ren, Y. L. Deng, A. D. Handoko, C. S. Chen, S. Malkhandi, B. S. Yeo, *ACS Catal.* **2015**, *5*, 2814.
- S10 A. Dutta, M. Rahaman, N. C. Luedi, P. Broekmann, M. Mohos, *ACS Catal.* **2016**, *6*, 3804.
- S11 D. F. Gao, I. Zegkinoglou, N. J. Divins, F. Scholten, I. Sinev, P. Grosse, B. R. Cuenya, *ACS Nano* **2017**, *11*, 4825.
- S12 C. S. Chen, A. D. Handoko, J. H. Wan, L. Ma, D. Ren, B. S. Yeo, *Catal. Sci. Technol.* **2015**, *5*, 161.
- S13 D. Kim, C. S. Kley, Y. F. Li, P. D. Yang, *Proc. Natl. Acad. Sci. U. S. A.* **2017**, *114*, 10560.
- S14 A. Loiudice, P. Lobaccaro, E. A. Kamali, T. Thao, B. H. Huang, J. W. Ager, R. Buonsanti, *Angew. Chem., Int. Ed.* **2016**, *55*, 5789.
- S15 D. Ren, N. T. Wong, A. D. Handoko, Y. Huang, B. S. Yeo, *J. Phys. Chem. Lett.* **2016**, *7*, 20.
- S16 H. Mistry, A. S. Varela, C. S. Bonifacio, I. Zegkinoglou, I. Sinev, Y. W. Choi, K. Kisslinger, E. A. Stach, J. C. Yang, P. Strasser, B. R. Cuenya, *Nat. Commun.* **2016**, *7*, 12123.
- S17 T. T. H. Hoang, S. Ma, J. I. Gold, P. J. A. Kenis, A. A. Gewirth, *ACS Catal.* **2017**, *7*, 3313.
- S18 D. Ren, B. S.-H. Ang, B. S. Yeo, *ACS Catal.* **2016**, *6*, 8239.
- S19 F. Li, S.-F. Zhao, L. Chen, A. Khan, D. R. MacFarlane, J. Zhang, *Energy Environ. Sci.* **2016**, *9*, 216.
- S20 K. Jiang, R. B. Sandberg, A. J. Akey, X. Liu, D. C. Bell, J. K. Nørskov, K. Chan, H. Wang, *Nat. Catal.* **2018**, *1*, 111.
- S21 S. Lee, D. Kim, J. Lee, *Angew. Chem., Int. Ed.* **2015**, *54*, 14701.
- S22 D. Raciti, K. J. Livi, C. Wang, *Nano Lett.* **2015**, *15*, 6829.
- S23 S. Y. Lee, H. Jung, N. K. Kim, H. S. Oh, B. K. Min, Y. J. Hwang, *J. Am. Chem. Soc.* **2018**, *140*, 8681.
